# Supplementary material for: Atomic-precise Pt2Cu4 cluster-based fluorescent sensor for rapid interleukin-6 detection
Source: Royal Society of Chemistry journal article supplement (doi:10.1039/d3ay00642e), 2023-01-01
Supplement: d3ay00642e1.pdf [file d3ay00642e1.pdf]

## Supporting Information

### Materials and chemicals

Levonorgestrel was purchased from Hubei Goto Biopharm Co., Ltd.  $\text{H}_2\text{PtCl}_6 \cdot 6\text{H}_2\text{O}$  and  $[\text{Cu}(\text{CH}_3\text{CN})_4]\text{PF}_6$ , 1-(3-Dimethylaminopropyl)-3-ethylcarbodiimide (EDC) and N-Hydroxysuccinimide (NHS) were purchased from Energy Chemical. Poly (styrene-*co*-maleic anhydride) (PSMA) was purchased from Macklin® Co., Ltd. 4-morpholineethanesulfonic acid (MES) was purchased from Aladdin® Co., Ltd. Monoclonal mouse antibodies for IL-6 (Ab1 and Ab2 recognize the different position of IL-6), goat anti-mouse IgG, IL-6 standard were purchased from Suzhou Hongxin Biotechnology Co., Ltd. sodium dodecyl sulfate (SDS) was purchased from Beijing Solarbio Science & Technology Co., Ltd.

### Instrumentation

TEM images were acquired with a Tecnai G2 F20 S-TWIN transmission electron microscope and JOEL JEM-2100 (operated at an acceleration voltage of 200 kV). DLS and Zeta potential measurements were performed on a Horiba SZ-100 Nanoparticle Size Analyzer. UV-Vis spectroscopy was acquired using a TU-1901 double-beam UV-Vis spectrophotometer. Steady-state emission spectra of the compound were analyzed using a Horiba FluoroLog-3 spectrofluorometer. ESI-TOF-MS spectroscopy was conducted on an AB SciexX500R Q-TOF spectrometer. Fourier transform infrared (FT-IR) spectroscopy was conducted using a Bruker TENSOR 27 FT-IR spectrometer in the 1000–4000  $\text{cm}^{-1}$  region with KBr pellet method. Elemental analyses (EA) were carried out with a Perkin-Elmer 240 elemental analyser.

### Synthesis of $\text{Pt}_2\text{Cu}_4$ cluster

$\text{Pt}_2\text{Cu}_4$  cluster was prepared according to a previously reported method. 1 mL  $\text{H}_2\text{PtCl}_6 \cdot 6\text{H}_2\text{O}$  (6.25  $\mu\text{mol}$ ) dissolved in methanol was added to 0.5 mL levonorgestrel solution in  $\text{CH}_2\text{Cl}_2$ , followed by addition of 8  $\mu\text{L}$   $\text{Et}_3\text{N}$ . 1 mL  $[\text{Cu}(\text{CH}_3\text{CN})_4]\text{PF}_6$  (4.6 mg, 12.5  $\mu\text{mol}$ ) in DCM was added, and then stirred for 2 h. The resultant suspension was centrifuged at 10000 rpm for 3 min, then allowed to evaporate slowly at room temperature to yield yellow strip crystals.

### **Preparation of carboxyl Pt<sub>2</sub>Cu<sub>4</sub> nanobeads (NBs)**

15 mg PSMA and 5 mg Pt<sub>2</sub>Cu<sub>4</sub> cluster were dissolved in 5 mL DCM, then slowly added to 45 mL water containing 20 mg SDS for crushing with ultrasound at a power of 500W for 30 minutes. The obtained solution was stirred at room temperature for 12 h and centrifuged at 14,000 rpm for 10 min, then suspended in water. Carboxyl Pt<sub>2</sub>Cu<sub>4</sub> NBs was acquired by hydrolysis of the anhydride groups with addition of ammonia.

### **Antibody conjugation to Pt<sub>2</sub>Cu<sub>4</sub>NBs (Pt<sub>2</sub>Cu<sub>4</sub>NBs-Ab1)**

100  $\mu$ L carboxyl Pt<sub>2</sub>Cu<sub>4</sub>NBs in MES buffer (pH 5.0, 50 mM) was activated with addition of 10  $\mu$ L NHS (2 mg/mL) and 10  $\mu$ L EDC (2 mg/mL) for 30 min. The above solution was centrifuged and suspended in CBS buffer (pH 9.6, 50 mM), followed by addition of 5  $\mu$ L IL-6 Ab1 for 2 h. Then, 20  $\mu$ L 4% BSA solution was added and stirred for 2 h to block the surface of nanospheres, and centrifuged at 14,000 rpm for 15 min at 4 °C.

### **Fabrication of Pt<sub>2</sub>Cu<sub>4</sub>-based immunochromatography test strips**

The test strip consists of nitrocellulose membrane, sample pad and absorbent pad. The IL-6 antibody Ab2 and goat anti-mouse IgG was diluted to proper concentrations, filtered, and dispensed on test line (T line) and control line (C line) at a jetting rate of 1  $\mu$ L/cm respectively. The distance between T line and C line was approximately 10 mm, and the width of strip was allowed cutting to 4 mm.

### **Lateral flow immunoassay for IL-6**

20  $\mu$ L sensing probe and 80  $\mu$ L sample with different concentrations of IL-6 were mixed in micro-well for 5 min reaction. Then, the strips were taken out for fluorescence imaging under UV light. Images were analyzed by image-J software to calculate the ratio of fluorescence intensity of test and control zones.

To evaluate specificity of the as-fabricated sensor, normal cytokines and proteins such as IL-12 , IL-10 , TNF- $\alpha$  , IFN- $\gamma$  , HSA and BSA were tested.

To verify the applicability of this method in serum samples, 100, 1000 and 5000 pg/mL IL-6 in bovine serum were tested.

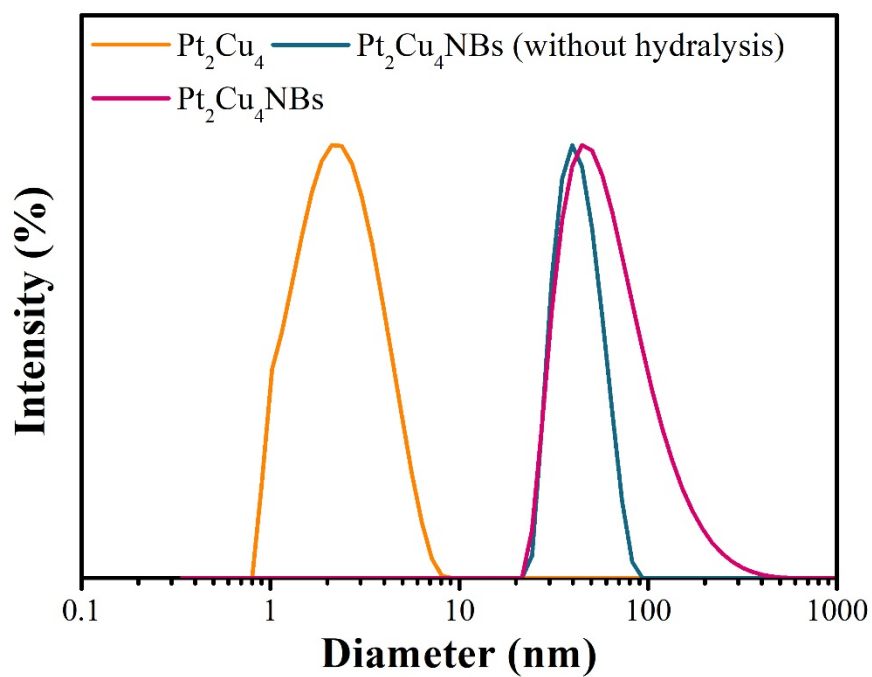

**Fig. S1.** Hydrodynamic diameter of  $\text{Pt}_2\text{Cu}_4$ ,  $\text{Pt}_2\text{Cu}_4\text{NBs}$  without hydrolysis and  $\text{Pt}_2\text{Cu}_4\text{NBs}$ .

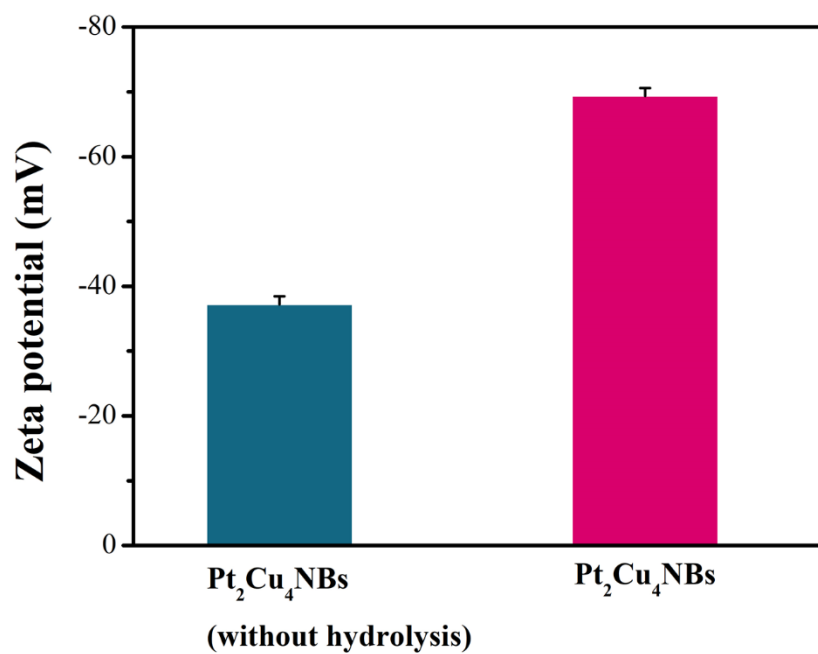

**Fig. S2.** Zeta potential of  $\text{Pt}_2\text{Cu}_4\text{NBs}$  without hydrolysis and  $\text{Pt}_2\text{Cu}_4\text{NBs}$ .

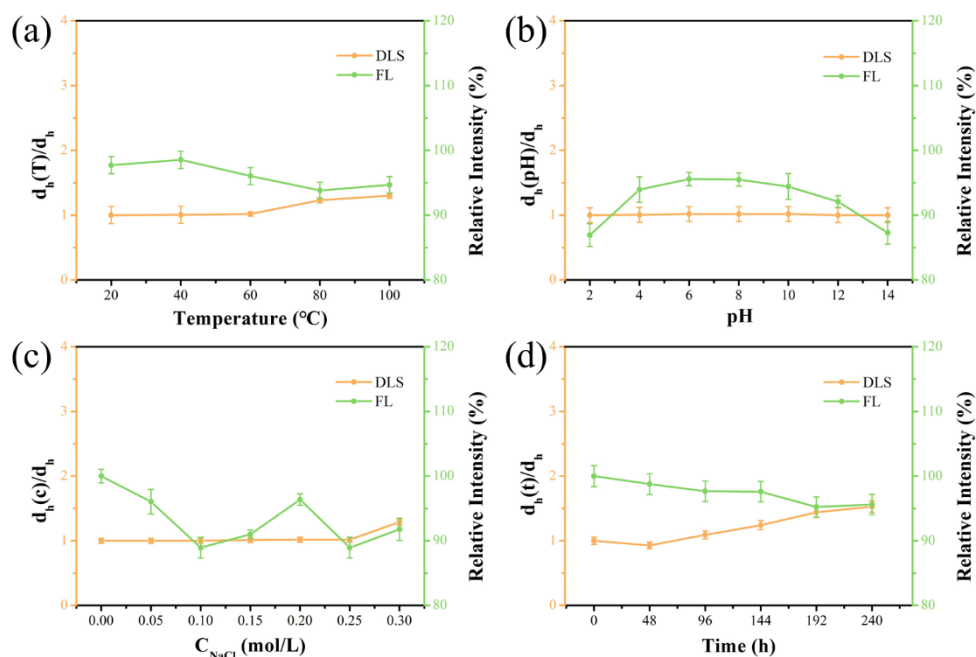

**Fig. S3.** Stability of Pt<sub>2</sub>Cu<sub>4</sub>NBs under (a) different temperatures, (b) different pH values, (c) different concentrations of NaCl solution, and (d) PBS for different time.  $d_h(C)$ ,  $d_h(pH)$ ,  $d_h(T)$ , and  $d_h(t)$  are the size of Pt<sub>2</sub>Cu<sub>4</sub>NBs in tested physiological environments, which was normalized to the DLS diameter ( $d_h$ ) of Pt<sub>2</sub>Cu<sub>4</sub>NBs in Milli-Q water at 25 °C, respectively.

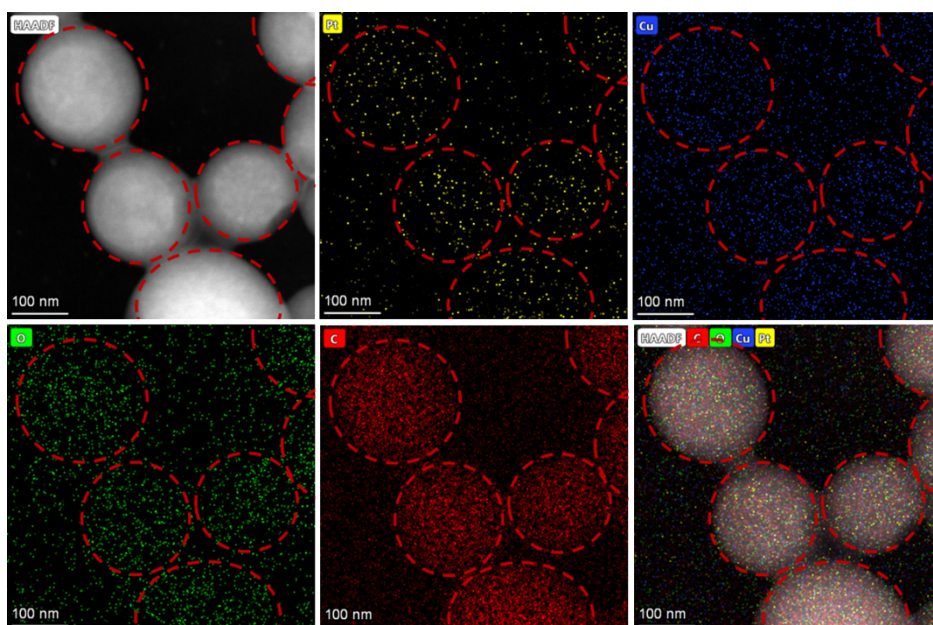

**Fig. S4.** TEM-EDXS mapping for Pt<sub>2</sub>Cu<sub>4</sub>NBs.

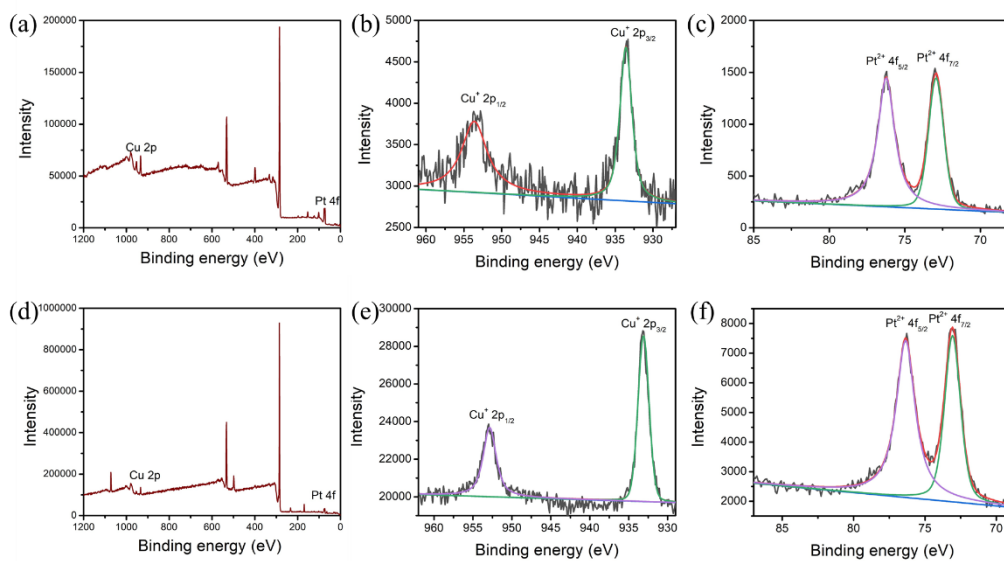

**Fig. S5.** XPS analysis for  $\text{Pt}_2\text{Cu}_4$  (a-c) and  $\text{Pt}_2\text{Cu}_4$  NBs (d-f).

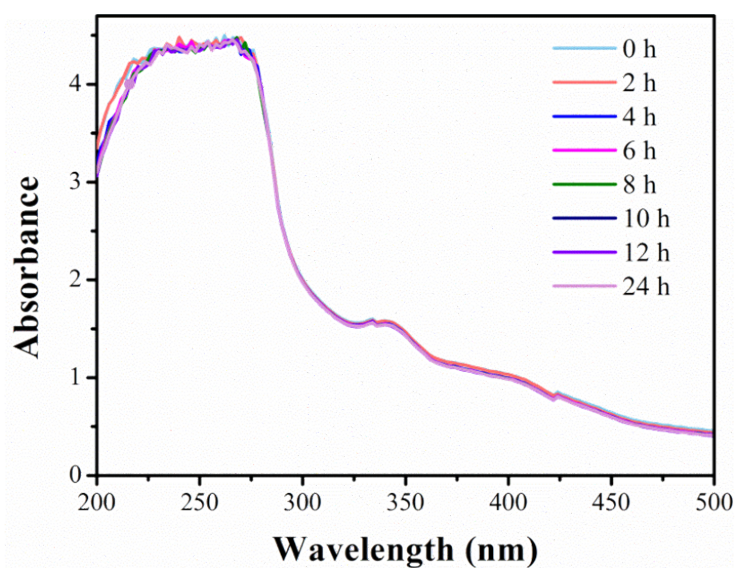

**Fig. S6.** The stability of UV-Vis absorption of  $\text{Pt}_2\text{Cu}_4\text{NBs-Abl}$ .

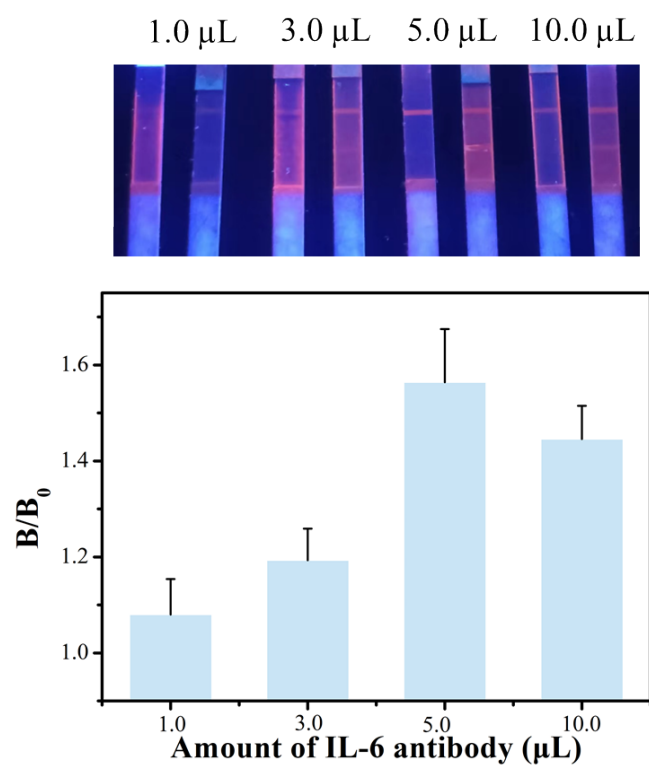

**Fig. S7.** Optimization of amount of IL-6 Ab for conjugation.

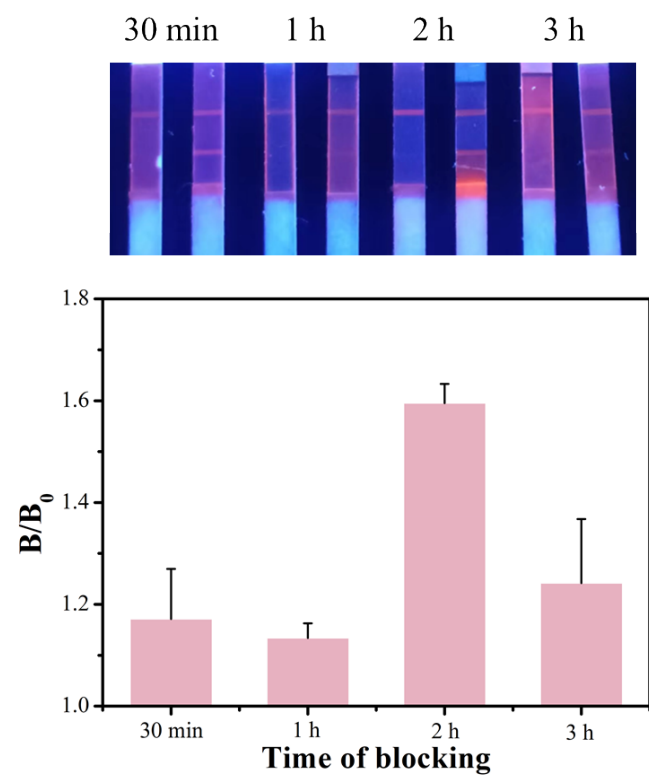

**Fig. S8.** Optimization of different time of blocking.

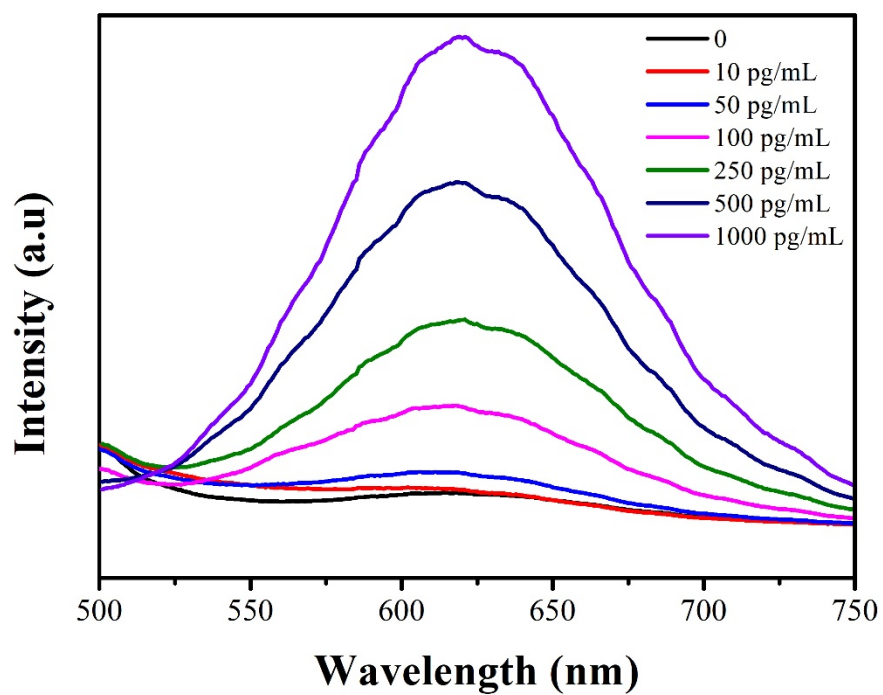

**Fig. S9.** Fluorescence spectrum of T lines with addition of 0–1000 pg/mL IL-6 under 365 nm laser excitation.

**Table S1.** EA (%) data of Pt<sub>2</sub>Cu<sub>4</sub> clusters.

| Sample                          | Element  | Calculated (%) | Experimental (%) |
|---------------------------------|----------|----------------|------------------|
| Pt <sub>2</sub> Cu <sub>4</sub> | Carbon   | 64.35          | 63.41            |
|                                 | Hydrogen | 6.94           | 6.97             |

**Table S2.** Comparison of different sensor platforms for the detection of IL-6.

| Signal probe type                 | Detection or amplification strategy      | Limit of detection | Incubation time (min) | Real sample analysis | Reference |
|-----------------------------------|------------------------------------------|--------------------|-----------------------|----------------------|-----------|
| AuNP                              | LFICS                                    | 65.2 ng/mL         | 10                    | Serum                | [1]       |
| Label free                        | Voltammetric immunosensors               | 4.8 pg/mL          | 30                    | Serum                | [2]       |
| TiO <sub>2</sub> /CdS/CdSe        | Photoelectrochemical                     | 0.38 pg/mL         | 60                    | /                    | [3]       |
| Thermal                           | Functionalized screen-printed electrodes | 3.4 pg/mL          | 45                    | Plasma               | [4]       |
| Au@Fe <sub>3</sub> O <sub>4</sub> | SERS                                     | 0.028 pg/mL        | 60                    | Serum                | [5]       |
| AuNPs                             | Electrochemical immunosensor             | 0.654 pg/mL        | About 13 h            | Serum                | [6]       |
| Fluorescence cluster              | LFICS                                    | 42.66 pg/mL        | 15                    | Serum                | This work |

**Table S3.** Recovery of IL-6 in serum samples.

| Sample | Spiked<br>concentration<br>(pg/mL) | Detect<br>concentration<br>(pg/mL) | Recovery (%) | CV(%) |
|--------|------------------------------------|------------------------------------|--------------|-------|
| Serum  | 10                                 | 9.84±1.05                          | 98.1         | 8.53  |
|        | 100                                | 96.79±6.16                         | 95.8         | 6.33  |
|        | 500                                | 491.01±56.84                       | 97.7         | 8.79  |

**Table S4.** Standard addition experiment of IL-6 in serum.

| Sample | Spiked<br>concentration<br>(pg/mL) | Detected<br>concentration<br>(pg/mL) | Calculation of<br>unknown<br>concentration | Calculated<br>value of<br>addition |
|--------|------------------------------------|--------------------------------------|--------------------------------------------|------------------------------------|
| Serum  | 20                                 | 30.93±0.76                           | 10.93±0.76                                 |                                    |
|        | 50                                 | 58.79±1.39                           | 8.79±1.39                                  | 9.37±1.87                          |
|        | 100                                | 108.39±3.48                          | 8.39±3.48                                  |                                    |

[1] Yan Man, Xuefei Lv, Javed Iqbal, Guang Peng, Da Song, Congxiao Zhang, Yulin Deng. Microchip based and immunochromatographic strip assays for the visual detection of interleukin-6 and of tumor necrosis factor alpha using gold nanoparticles as labels. *Microchimica Acta*. 2015;182:597-604.

[2] Rocco Cancelliere, Alessio Di Tinno, Andrea Maria Di Lellis, Giorgio Contini, Laura Micheli, Emanuela Signori. Cost-effective and disposable label-free voltammetric immunosensor for sensitive detection of interleukin-6. *Biosensors and*

Bioelectronics. 2022;213:114467.

[3] Gao-Chao Fan, Xiao-Lin Ren, Cheng Zhu, Jian-Rong Zhang, Jun-Jie Zhu. A new signal amplification strategy of photoelectrochemical immunoassay for highly sensitive interleukin-6 detection based on TiO<sub>2</sub>/CdS/CdSe dual co-sensitized structure. Biosensors and Bioelectronics. 2014;59:45-53.

[4] Robert D. Crapnell, Whitchuta Jesadabundit, Alejandro García-Miranda Ferrari, Nina C. Dempsey-Hibbert, Marloes Peeters, Ascanio Tridente, Orawon Chailapakul, Craig E. Banks. Toward the Rapid Diagnosis of Sepsis: Detecting Interleukin-6 in Blood Plasma Using Functionalized Screen-Printed Electrodes with a Thermal Detection Methodology. Analytical Chemistry. 2021;93:5931-5938.

[5] Tianhua Xie, Di Xu, Yunsheng Shang, Yunpeng Li, Yingqiu Gu, Guohai Yang, Lulu Qu. Highly sensitive SERS detection of IL-6 in serum by Au@Fe<sub>3</sub>O<sub>4</sub> nanoring-based sandwich immunoassay. Sensors and Actuators B: Chemical. 2023;375:132897.

[6] Dongmin Shi, Chiye Zhang, Xiaoyuan Li, Jie Yuan. An electrochemical paper-based hydrogel immunosensor to monitor serum cytokine for predicting the severity of COVID-19 patients. Biosensors and Bioelectronics. 2023;220:114898.
